# Supplementary material
Source: MDPI journal article supplement (https://www.mdpi.com/2079-6412/13/11/1932)
Supplement: s1 [file s1 › coatings-2692213-supplementary.pdf]

*Article*

# Tantalum Oxide Thin Films Sputter-Deposited by Oxygen Gas Pulsing

Nicolas Martin <sup>1,\*</sup>, Jean-Marc Cote <sup>1</sup>, Joseph Gavaille <sup>1</sup> and Valérie Potin <sup>2</sup>

<sup>1</sup> Institut FEMTO-ST, SUPMICROTECH-ENSMM, CNRS, 15B, Avenue des Montboucons, CEDEX, F-25030 Besancon, France; jeanmarc.cote@femto-st.fr (J.-M.C.); joseph.gavaille@ens2m.fr (J.G.)

<sup>2</sup> Laboratoire Interdisciplinaire Carnot de Bourgogne (ICB), UMR 6303, CNRS, University Bourgogne Franche-Comté, 9, Avenue Alain Savary, BP 47 870, CEDEX, F-21078 Dijon, France; valerie.potin@u-bourgogne.fr

\* Correspondence: nicolas.martin@femto-st.fr; Tel.: +33-363-08-2431

## SECTION I: Intensity profile from HRTEM cross-section observations

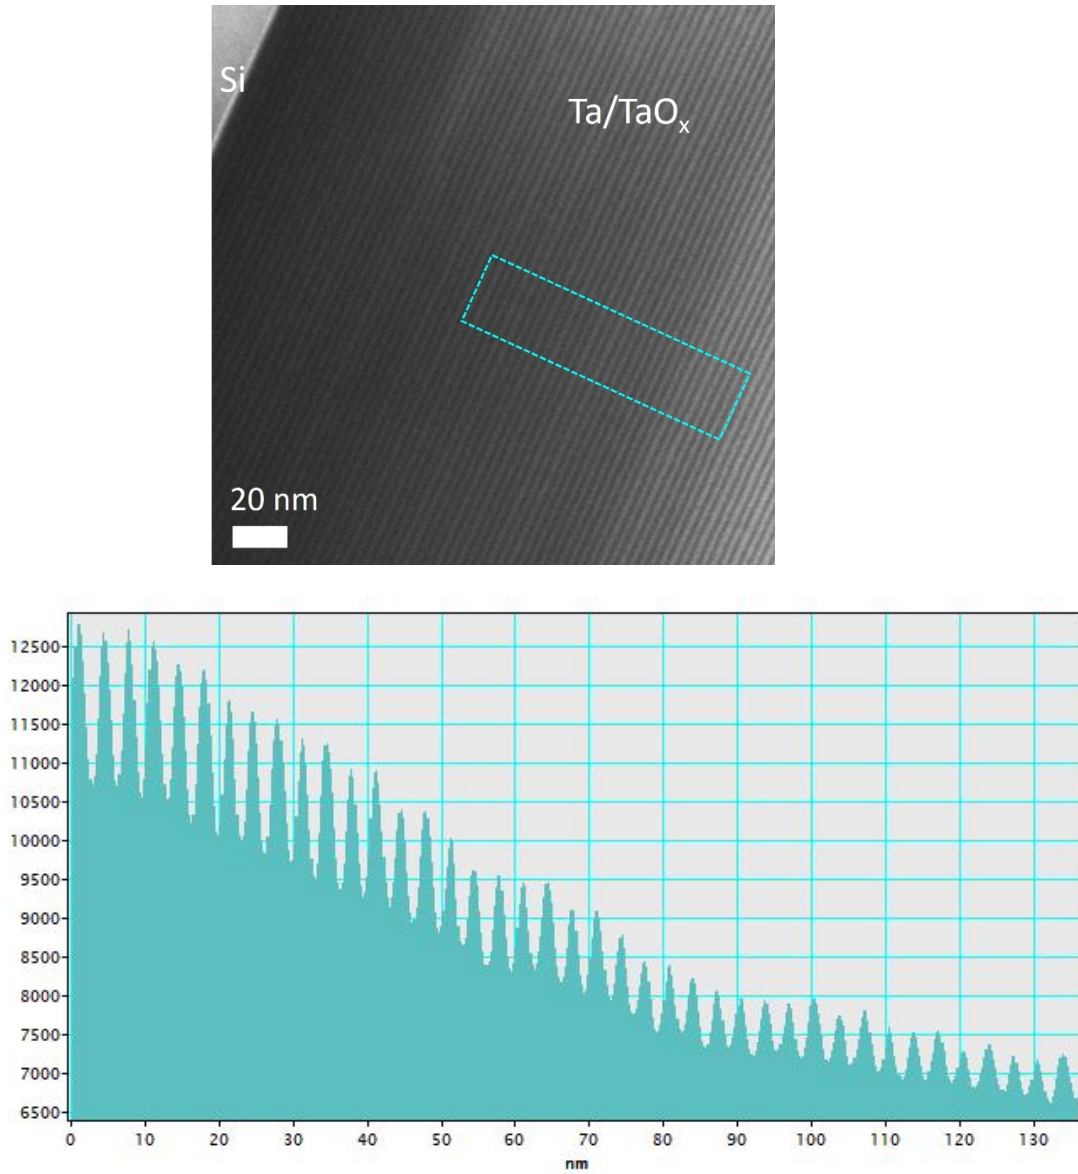

**Figure S1.** Intensity profile for a Ta/TaO<sub>x</sub> periodic multilayer prepared with an oxygen injection time  $t_{ON} = 3$  s. It has been extracted from an HRTEM image (blue-green area, Figure 5a) and points out the regular stacked sequence. Lower and higher intensities correspond to metallic and oxide sub-layers, respectively. The background decrease is linked to the variation of the specimen thickness (crossed by the electron beam) after TEM specimen preparation.

## SECTION II: EDX analyses

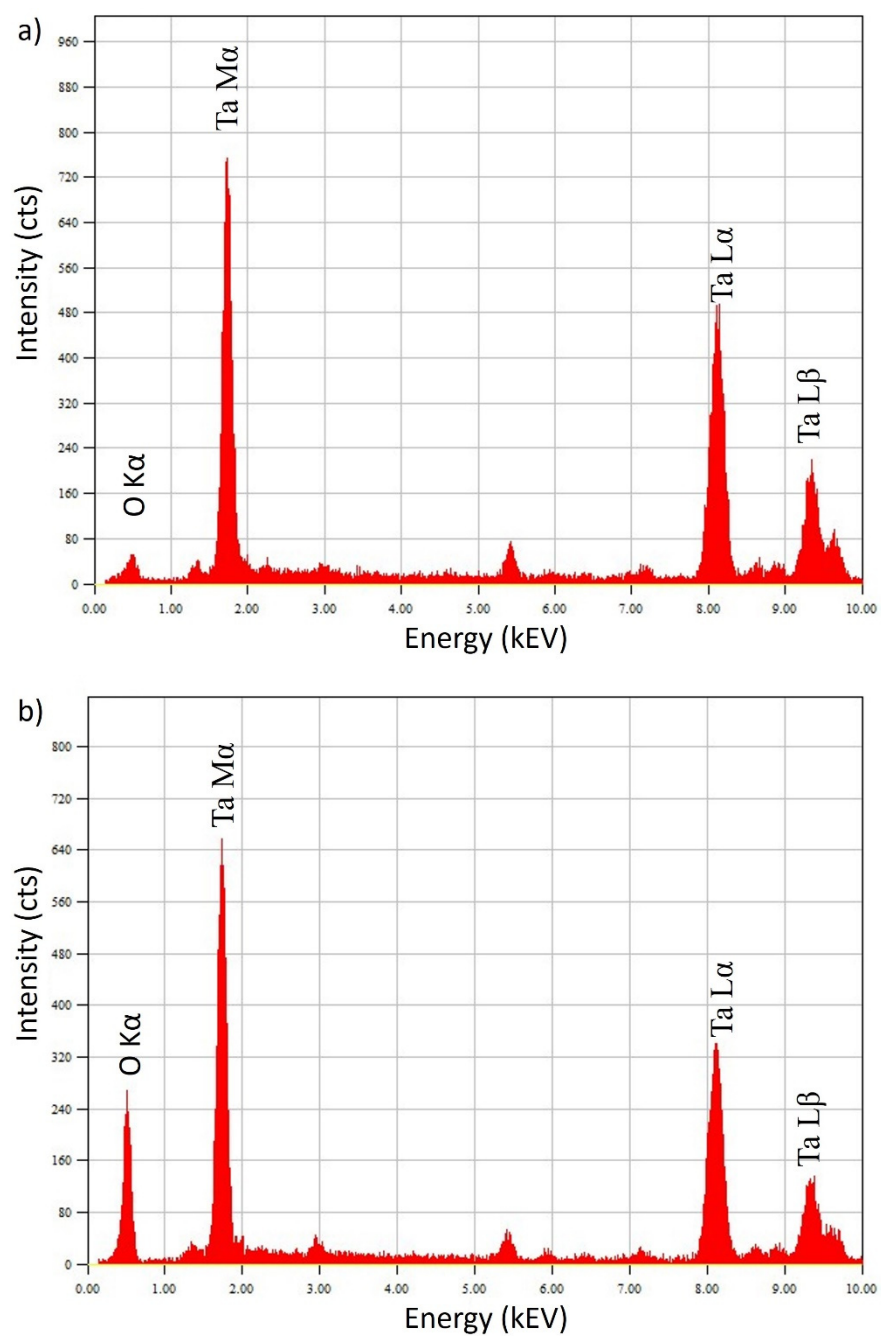

**Figure S2.** Typical EDX spectra recorded in a) a Ta sub-layer (Ta: 80 at. %, O: 20 at. %) and b) a TaO<sub>x</sub> sub-layer (Ta: 30 at. %, O: 70 at. %). Atomic quantification was performed with the ratio method.

### SECTION III: Electron diffraction

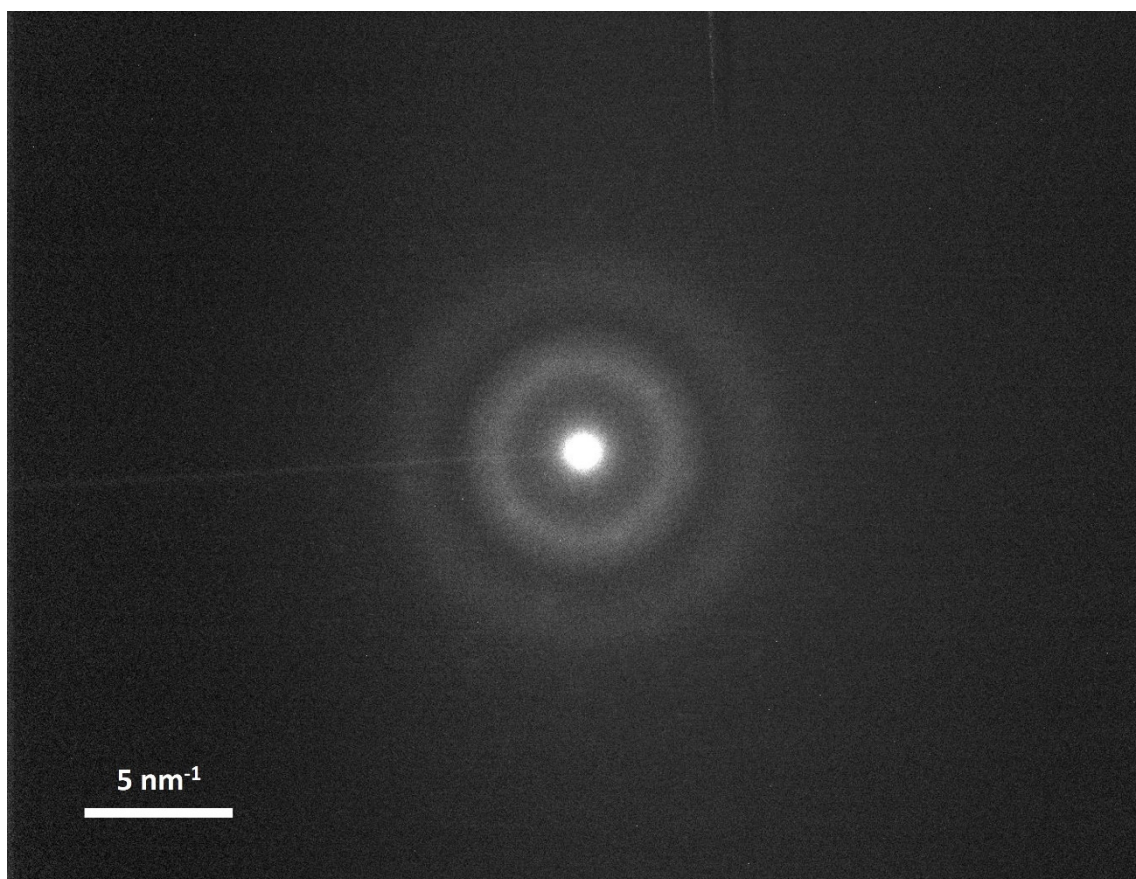

**Figure S3.** Typical diffraction pattern obtained for TaO<sub>x</sub> films prepared with  $t_{\text{ON}}$  injection time higher than 3 s. It confirms the amorphous character of TaO<sub>x</sub>, already pointed out by XRD (Figure 3).
